# Supplementary material for: Intracellular prostaglandin E2 contributes to hypoxia-induced proximal tubular cell death
Source: PubMed Central journal article supplement (PMC8007803; doi:10.1038/s41598-021-86219-w), 2021-03-29

# INTRACELLULAR PROSTAGLANDIN E2 CONTRIBUTES TO HYPOXIA-INDUCED PROXIMAL TUBULAR CELL DEATH.

**Short title: INTRACELLULAR PGE<sub>2</sub> IN HYPOXIC CELL DEATH**

Coral García-Pastor\*, Selma Benito-Martínez\*, Ricardo J. Bosch\*, Ana B. Fernández-Martínez\*\*<sup>1</sup>,  
Francisco J. Lucio-Cazaña\*<sup>1</sup>

\*Departamento de Biología de Sistemas, Universidad de Alcalá, Alcalá de Henares, Madrid

\*\* Departamento de Biología, Universidad Autónoma de Madrid, Madrid

<sup>1</sup> These authors contributed equally to this work

Address correspondence to:

Ana Belén Fernández-Martínez, Ph. D.

Departamento de Biología

Universidad Autónoma de Madrid

28049 Madrid

Phone: +34 91 497 8142

e-mail: [anab.fernandez@uam.es](mailto:anab.fernandez@uam.es)

## Supplementary Information File

1. Treatment with BG does not modify cell shape: phalloidin (green)/DAPI (blue) staining
2. a) Full length blot corresponding to the inset in Fig 2 a, lower panel, left: PGT and  $\beta$ -actin; b) Full length blot corresponding to the inset in Fig. 2 b: 15-PGDH and  $\beta$ -actin; c) Full length blots corresponding to Fig 2 e: Bcl-2, Bax and  $\beta$ -actin; d) Kinetics of cell death (trypan blue dye exclusion test) during reoxygenation after 24 h under hypoxia (1% O<sub>2</sub>) and absence of effect of PGT inhibitor bromocresol green (BG). Cells were pre-incubated for 1 h with 50  $\mu$ M BG inhibitors of the pathway. Each bar represents the mean  $\pm$ SD of 3 different experiments \**P* < 0.01 vs control.
3. a) Full length blot corresponding to Fig. 3 a (COX-2 and  $\beta$ -actin) and its inset (mPGES-1 and  $\beta$ -actin); b and c) Full length blots corresponding to Fig. 3 d and e: COX-2 and  $\beta$ -actin; d) Full length blot corresponding to the inset in Fig. 3 f: HIF-1 $\alpha$  and  $\beta$ -actin

Figure supplementary 1

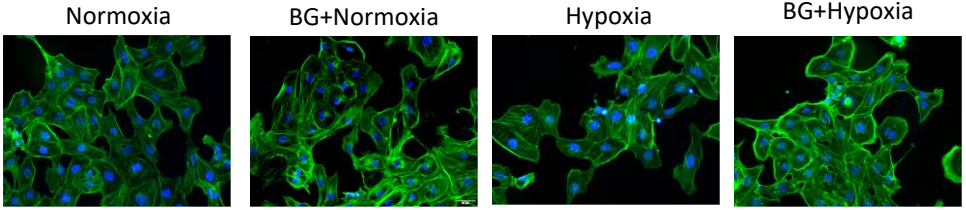

Figure supplementary 2

a)

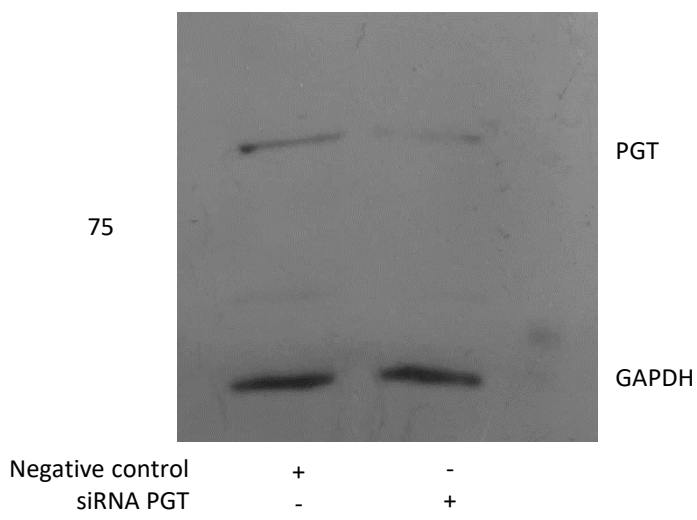

b)

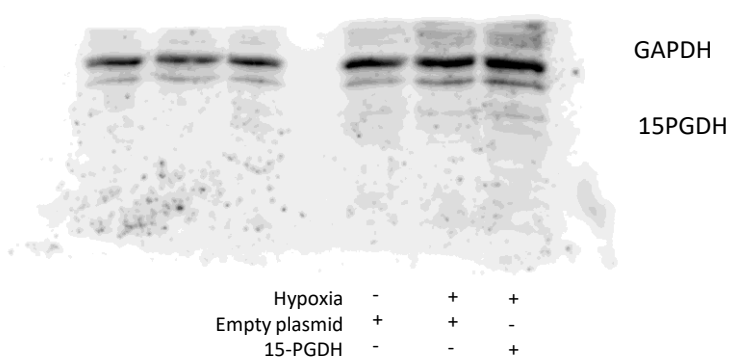

c)

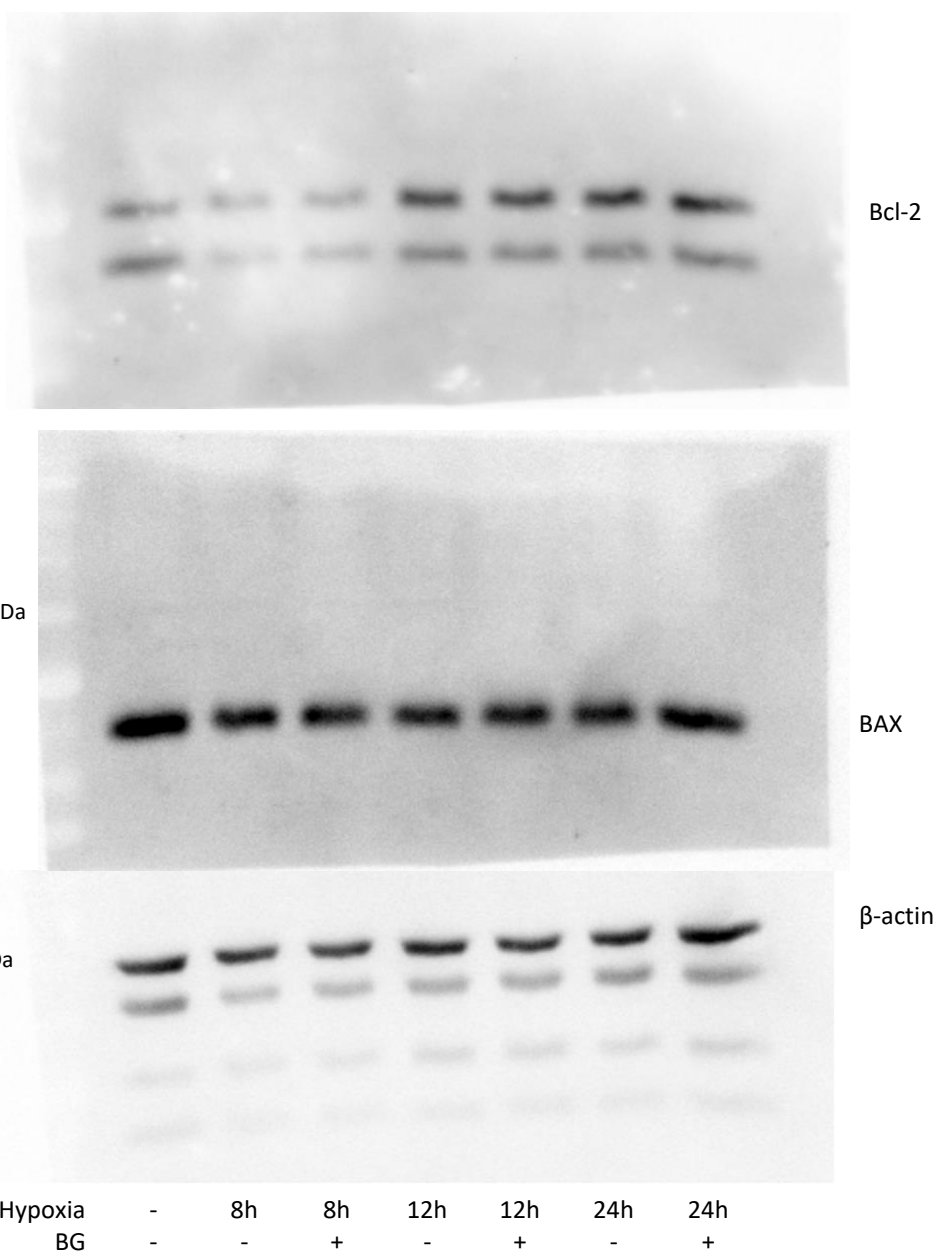

d)

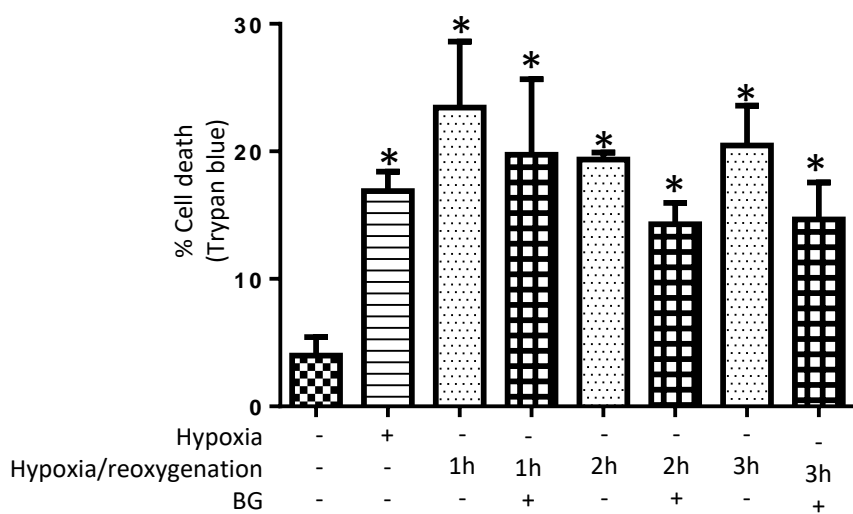

Figure supplementary 3

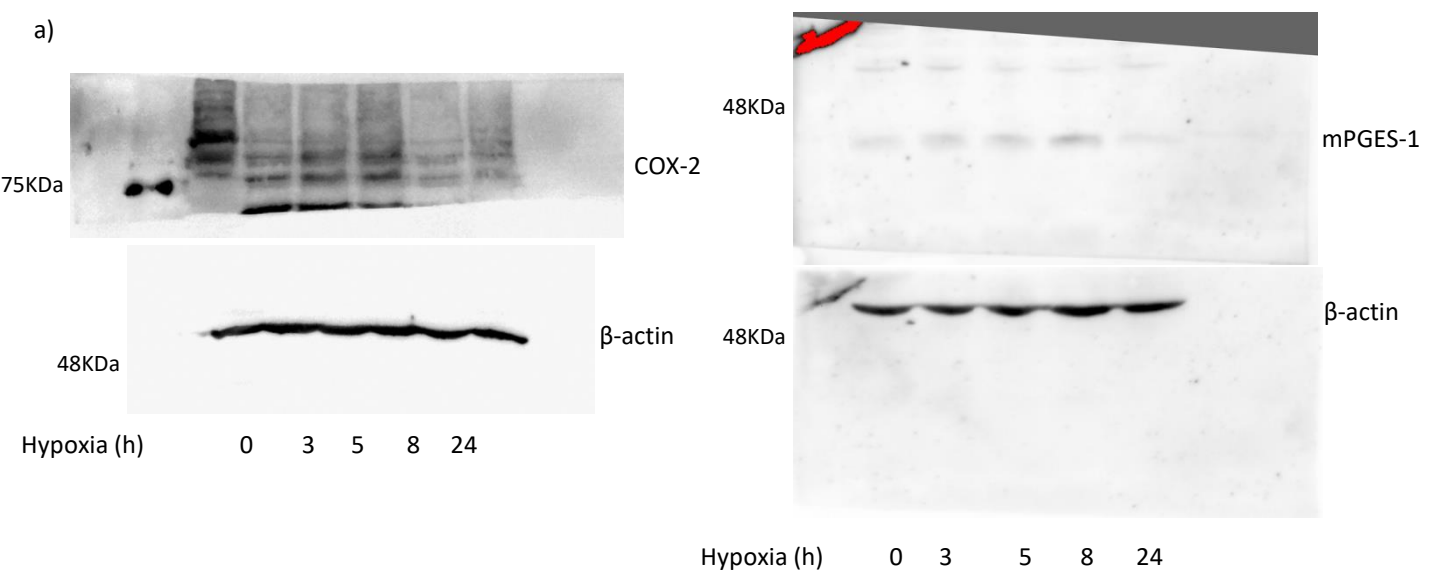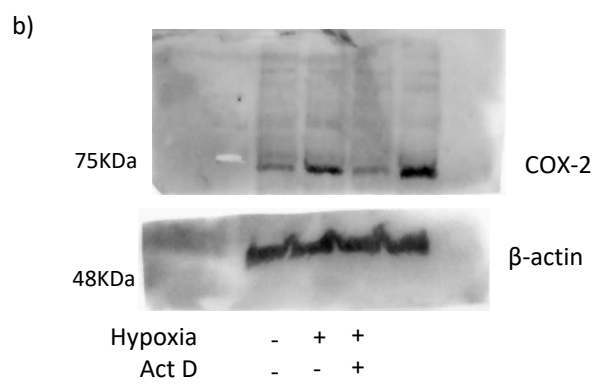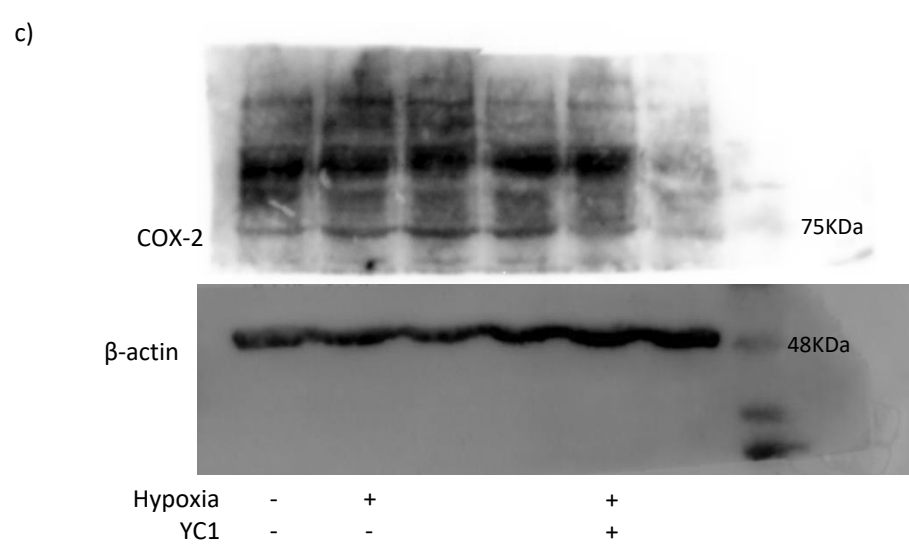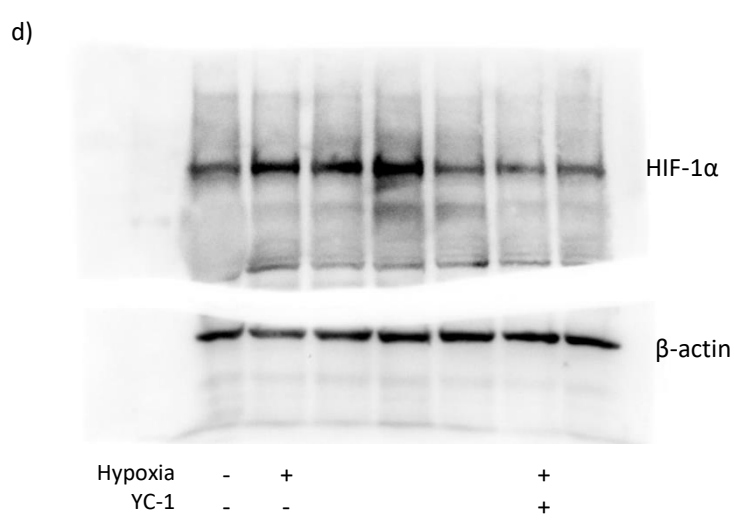

Supplement: 41598_2021_86219_MOESM1_ESM.pdf [file 41598_2021_86219_MOESM1_ESM.pdf]
